# Supplementary material
Source: PubMed Central journal article supplement (PMC8515103)
Supplement: bmjsrh-2020-200976supp001.pdf [file bmjsrh-2020-200976supp001.pdf]

**Supplementary Figure 1:** Patient journey through telemedicine early medical abortion care (CCBY4.0 John Reynolds-Wright available from <https://flic.kr/p/2j8HtKK>)

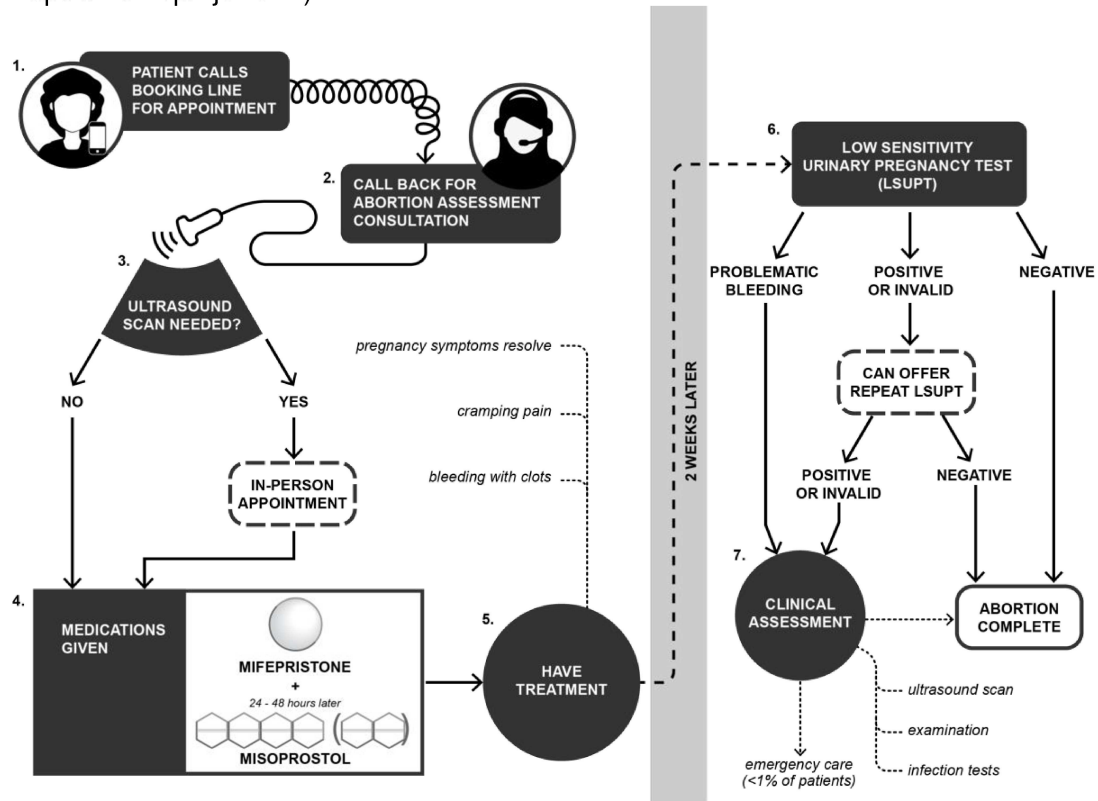

**Supplementary Figure 2: Questionnaires****DAY FOUR QUESTIONS**

Question 1:

Did you take the first tablet (mifepristone, 1 tablet that you swallow)?

Circle: Yes / No

If yes, do you remember when:

Date: \_\_\_\_\_ Time: \_\_\_\_\_

Or circle: Don't remember

Question 2:

Do you remember the date and time you took the first dose of your misoprostol tablets (4 tablets under the tongue or inside the vagina)?

Circle: Yes / No

If yes:

Date: \_\_\_\_\_ Time: \_\_\_\_\_

Did you take the tablets (circle): under the tongue / inside the vagina /  
between your cheek and gum ?

Question 3:

Did you use any additional doses of misoprostol? (2 more tablets under the tongue or inside the vagina)

Circle: Yes / No

If yes:

How many further doses (i.e. pairs of tablets) did you take? \_\_\_\_\_

Question 4:

Do you remember the date and time that you passed the pregnancy?

Circle: Yes / No / Unsure

If yes:

Date: \_\_\_\_\_ Time: \_\_\_\_\_

## Question 5:

How acceptable did you find having your abortion treatment in your own home?

(please circle)

- Very acceptable
- Somewhat acceptable
- Neutral
- Somewhat unacceptable
- Very unacceptable

## Question 6:

How prepared did you feel for having your abortion treatment at home? (please

circle)

- Very prepared
- Somewhat prepared
- Neutral
- Somewhat unprepared
- Very unprepared

## Question 7:

If you had to have this treatment again, where would you rather have it:

- At my own home
- In hospital
- Have a surgical procedure
- Not sure

**DAY FOURTEEN QUESTIONS**

Question 8: When did you do your pregnancy test and what was the result?

LoSUPT date: \_\_\_\_\_

LoSUPT result:          Positive    /    Negative    /    Invalid

Question 9: Were you given a supply of contraceptive pills?    Yes    /    No

If Yes, have you started them:    Yes    /    Not yet but I will    /

No, I am going to use something else

Question 10:

Looking back, how acceptable did you find having your consultation remotely?

- Very acceptable
- Somewhat acceptable
- Neutral
- Somewhat unacceptable
- Very unacceptable

Question 11:

Looking back, if you were able to choose a type of consultation for this procedure which would you choose?

- Face-to-Face
- Telephone
- Video call
- Unsure

## Question 12:

If you were to design the perfect service, which of the following would be important to you:

|                                                           | Very Unimportant | Somewhat Unimportant | Neutral | Somewhat Important | Very Important |
|-----------------------------------------------------------|------------------|----------------------|---------|--------------------|----------------|
| Having an ultrasound scan                                 |                  |                      |         |                    |                |
| Evening face-to-face clinic                               |                  |                      |         |                    |                |
| Evening telephone consultation                            |                  |                      |         |                    |                |
| Skype or video consultation                               |                  |                      |         |                    |                |
| A mobile phone app to send/receive information in advance |                  |                      |         |                    |                |
| Online booking                                            |                  |                      |         |                    |                |
| Medication posted to me                                   |                  |                      |         |                    |                |
| Medication that could collect from a local pharmacy       |                  |                      |         |                    |                |
| Able to get the treatment from my GP                      |                  |                      |         |                    |                |

**Supplementary Table 1.** Medication pack for medical abortion at home.

\*FSRH = Faculty of Sexual and Reproductive Healthcare UK.

|                          |                                                                                                                                                                                                                                                                                                                                                                                                                                                                                        |
|--------------------------|----------------------------------------------------------------------------------------------------------------------------------------------------------------------------------------------------------------------------------------------------------------------------------------------------------------------------------------------------------------------------------------------------------------------------------------------------------------------------------------|
| Abortion medications     | <p>Mifepristone 200mg Oral</p> <p>24-48 hours later</p> <p>Misoprostol 800micrograms sublingual/vaginal/buccal (per patient preference)</p> <p>Plus a further 1 x 400micrograms of misoprostol if no bleeding within 4 hours of first dose</p> <p>For 10-11+6 weeks only:<br/>a further 400micrograms of misoprostol if not passed pregnancy by 4 hours of last dose</p> <p>&lt;10 weeks provided 1200 mcg misoprostol total and 10-11+6 weeks provided 1600 mcg misoprostol total</p> |
| Analgesia                | <p>Dihydrocodeine 30mg</p> <p>Women advised to purchase their own supply of paracetamol and ibuprofen.</p>                                                                                                                                                                                                                                                                                                                                                                             |
| Antibiotics              | Doxycycline 100mg twice daily for 7 days                                                                                                                                                                                                                                                                                                                                                                                                                                               |
| Antiemetic (if required) | Cyclizine 50mg oral                                                                                                                                                                                                                                                                                                                                                                                                                                                                    |
| Confirmation of abortion | Low Sensitivity Urine Pregnancy Test 1000iu at 14 days                                                                                                                                                                                                                                                                                                                                                                                                                                 |
| Contraception            | <p>Pills, patches, rings and condoms supplied in pack. Combined hormonal methods issued in accordance with FSRH* advice.</p> <p>Long acting reversible contraceptives provided at rapid access clinic and bridging method offered.</p>                                                                                                                                                                                                                                                 |
| Information              | Detailed step-by-step information provided as written leaflet included in pack.                                                                                                                                                                                                                                                                                                                                                                                                        |
